# Supplementary material for: Comprehensive multi-hazard risk assessment in data-scarce regions. A study focused on Burundi
Source: Copernicus journal article supplement (doi:10.5194/egusphere-2024-3445), 2025-01-21
Supplement: Supplementary file [file egusphere-2024-3445-AC1-supplement.zip]

## COMPONENT FACTSHEET - Population characteristics

|                                              |                                                                                                                                                                                                                                                                                                                                |
|----------------------------------------------|--------------------------------------------------------------------------------------------------------------------------------------------------------------------------------------------------------------------------------------------------------------------------------------------------------------------------------|
| Component name                               | Population characteristics                                                                                                                                                                                                                                                                                                     |
| Position in conceptual framework/description | Population characteristics is one of four components that build the category Socioeconomic vulnerability. It comprises four subcomponents, two at colline resolution and two at province resolution. It provides information on current and projected population density, disadvantaged populations and household composition. |

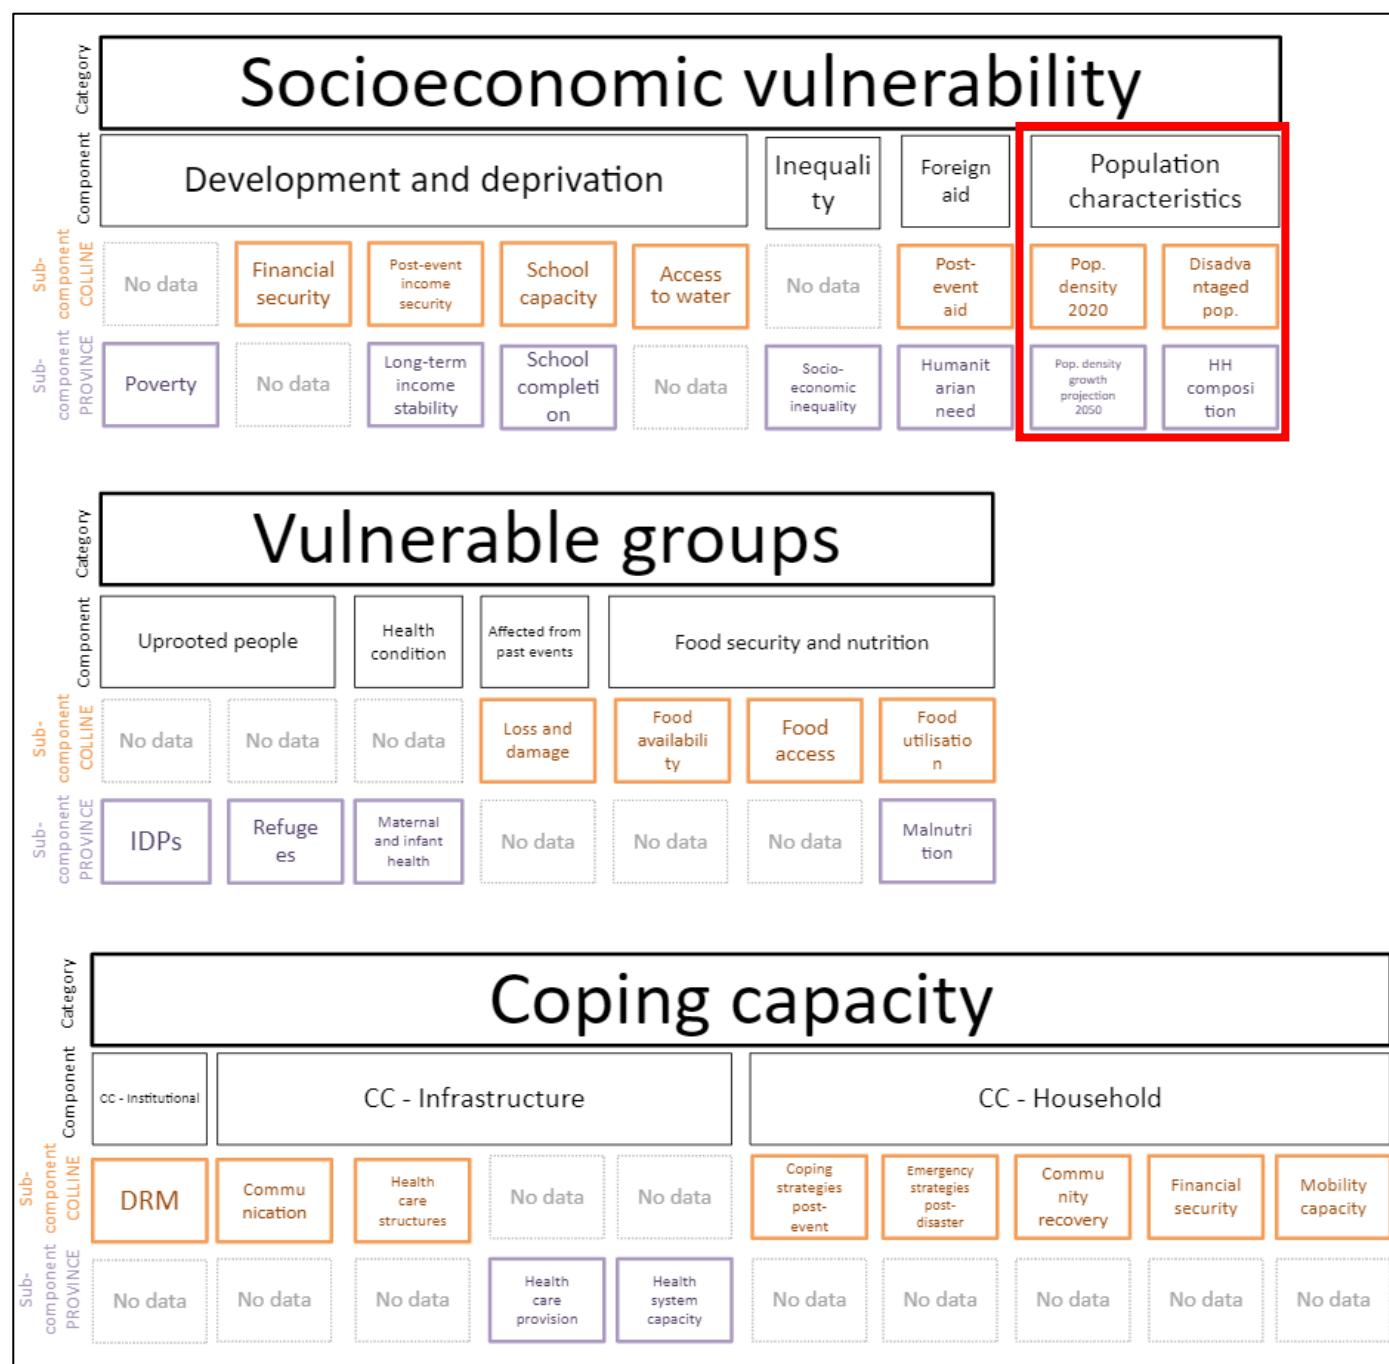

|               |                                                                 |
|---------------|-----------------------------------------------------------------|
| Contact point | Jess L. Delves, Eurac Research                                  |
|               | Email: <a href="mailto:jdelves@eurac.edu">jdelves@eurac.edu</a> |

Project: Multi-Hazard Assessment and Risk Mapping in Burundi. September 2020 – December 2021.

Contractor: UN IOM

Consortium: IDOM, Ramboll, Eurac Research, Meteosim, GIIS

## INPUT SUBCOMPONENTS

### SUBCOMPONENT 1

|                    |                                                                                                                                                    |
|--------------------|----------------------------------------------------------------------------------------------------------------------------------------------------|
| Name               | Population density growth 2050                                                                                                                     |
| Spatial resolution | Province                                                                                                                                           |
| Description        | The Population density growth 2050 subcomponent is built from one indicator at province resolution, showing the rate of population density growth. |
| Completeness       | 18/18 valid                                                                                                                                        |

### Input indicator 1

|                       |                                                                                                                                                                                                                                                                                                                                                                                                                                                       |
|-----------------------|-------------------------------------------------------------------------------------------------------------------------------------------------------------------------------------------------------------------------------------------------------------------------------------------------------------------------------------------------------------------------------------------------------------------------------------------------------|
| Name                  | Population density growth                                                                                                                                                                                                                                                                                                                                                                                                                             |
| Spatial resolution    | Province                                                                                                                                                                                                                                                                                                                                                                                                                                              |
| Description           | Rate of population density growth calculated using population projections for 2050. The higher the rate, the higher the vulnerability.                                                                                                                                                                                                                                                                                                                |
| Completeness          | 18/18 valid                                                                                                                                                                                                                                                                                                                                                                                                                                           |
| Unit of measurement   | People/km <sup>2</sup>                                                                                                                                                                                                                                                                                                                                                                                                                                |
| Method of calculation | Population density growth rate: Calculating the (projected) population density per km <sup>2</sup> for 2021 and 2050 (using <i>Population 2021</i> , <i>Population growth projection 2050</i> and <i>Province area km2</i> ). The difference in population density between 2021 and 2050 is the projected population density growth rate. Population density growth rate was divided into five classes of vulnerability, according to expert opinion. |

### Input variable 1

|                     |                                                          |
|---------------------|----------------------------------------------------------|
| Population 2021     |                                                          |
| Source of data      | UNFPA/ISTEEBU (reference year 2021, projected from 2008) |
| Type of data        | Table (csv, excel)                                       |
| Statistical scale   | Metric                                                   |
| Unit of measurement | Absolute numbers                                         |
| Completeness        | 18/18 valid                                              |

### Input variable 2

|                                   |                                                                          |
|-----------------------------------|--------------------------------------------------------------------------|
| Population growth projection 2050 |                                                                          |
| Source of data                    | Projections démographiques 2010-2050 niveau national et provincial, 2017 |
| Type of data                      | Table (csv, excel)                                                       |
| Statistical scale                 | Metric                                                                   |
| Unit of measurement               | Absolute numbers                                                         |
| Completeness                      | 18/18 valid                                                              |

Project: Multi-Hazard Assessment and Risk Mapping in Burundi. September 2020 – December 2021.

Contractor: UN IOM

Consortium: IDOM, Ramboll, Eurac Research, Meteosim, GIIS

|                     |                                                                 |                     |
|---------------------|-----------------------------------------------------------------|---------------------|
| Input variable 3    | Province area km2                                               |                     |
| Source of data      | ISTEEBU, 2018                                                   |                     |
| Type of data        | Geodata (shapefiles)                                            |                     |
| Statistical scale   | Metric                                                          |                     |
| Unit of measurement | km²                                                             |                     |
| Completeness        | 18/18 valid                                                     |                     |
| Classes/thresholds  | Population density growth<br>2021-2050 (increase<br>people/km²) |                     |
|                     | Indicator value                                                 | Vulnerability class |
|                     | <150                                                            | 1                   |
|                     | 150-<250                                                        | 2                   |
|                     | 250-<350                                                        | 3                   |
|                     | 350-<450                                                        | 4                   |
|                     | ≥450                                                            | 5                   |
| Additional comments | NA                                                              |                     |

Project: Multi-Hazard Assessment and Risk Mapping in Burundi. September 2020 – December 2021.

Contractor: UN IOM

Consortium: IDOM, Ramboll, Eurac Research, Meteosim, GIIS

| SUBCOMPONENT 2                                      |                                                                                                                                                                                                                                                                                                                                                                                                                |                                                     |  |                 |                     |      |   |         |   |         |   |         |   |      |   |
|-----------------------------------------------------|----------------------------------------------------------------------------------------------------------------------------------------------------------------------------------------------------------------------------------------------------------------------------------------------------------------------------------------------------------------------------------------------------------------|-----------------------------------------------------|--|-----------------|---------------------|------|---|---------|---|---------|---|---------|---|------|---|
| Name                                                | Household composition                                                                                                                                                                                                                                                                                                                                                                                          |                                                     |  |                 |                     |      |   |         |   |         |   |         |   |      |   |
| Spatial resolution                                  | Province                                                                                                                                                                                                                                                                                                                                                                                                       |                                                     |  |                 |                     |      |   |         |   |         |   |         |   |      |   |
| Description                                         | The Household composition subcomponent is built from two indicators at province resolution, the percentage of active population and percentage of woman headed households.                                                                                                                                                                                                                                     |                                                     |  |                 |                     |      |   |         |   |         |   |         |   |      |   |
| Completeness                                        | 18/18 valid                                                                                                                                                                                                                                                                                                                                                                                                    |                                                     |  |                 |                     |      |   |         |   |         |   |         |   |      |   |
| <b>Input indicator 1</b>                            |                                                                                                                                                                                                                                                                                                                                                                                                                |                                                     |  |                 |                     |      |   |         |   |         |   |         |   |      |   |
| Name                                                | Active population                                                                                                                                                                                                                                                                                                                                                                                              |                                                     |  |                 |                     |      |   |         |   |         |   |         |   |      |   |
| Spatial resolution                                  | Province                                                                                                                                                                                                                                                                                                                                                                                                       |                                                     |  |                 |                     |      |   |         |   |         |   |         |   |      |   |
| Description                                         | The number of people considered potentially economically active, expressed as a percentage of total population. Active population is considered age 10 - 65 (expert opinion). The smaller the active population, the higher the vulnerability.                                                                                                                                                                 |                                                     |  |                 |                     |      |   |         |   |         |   |         |   |      |   |
| Completeness                                        | 18/18 valid                                                                                                                                                                                                                                                                                                                                                                                                    |                                                     |  |                 |                     |      |   |         |   |         |   |         |   |      |   |
| Unit of measurement                                 | % of active population in total population of province                                                                                                                                                                                                                                                                                                                                                         |                                                     |  |                 |                     |      |   |         |   |         |   |         |   |      |   |
| Method of calculation                               | Percentage: Calculating percentage share of people aged 10-65 in total population. Percentage share of active population was divided into five classes of vulnerability, according to expert opinion.                                                                                                                                                                                                          |                                                     |  |                 |                     |      |   |         |   |         |   |         |   |      |   |
| <b>Input variable 1</b>                             | Population 2021                                                                                                                                                                                                                                                                                                                                                                                                |                                                     |  |                 |                     |      |   |         |   |         |   |         |   |      |   |
| Source of data                                      | UNFPA/ISTEEBU (reference year 2021, projected from 2008)                                                                                                                                                                                                                                                                                                                                                       |                                                     |  |                 |                     |      |   |         |   |         |   |         |   |      |   |
| Type of data                                        | Table (csv, excel)                                                                                                                                                                                                                                                                                                                                                                                             |                                                     |  |                 |                     |      |   |         |   |         |   |         |   |      |   |
| Statistical scale                                   | Metric                                                                                                                                                                                                                                                                                                                                                                                                         |                                                     |  |                 |                     |      |   |         |   |         |   |         |   |      |   |
| Unit of measurement                                 | Absolute numbers                                                                                                                                                                                                                                                                                                                                                                                               |                                                     |  |                 |                     |      |   |         |   |         |   |         |   |      |   |
| Completeness                                        | 18/18 valid                                                                                                                                                                                                                                                                                                                                                                                                    |                                                     |  |                 |                     |      |   |         |   |         |   |         |   |      |   |
| <b>Input variable 2</b>                             | Population 2021 (10 - 65 years)                                                                                                                                                                                                                                                                                                                                                                                |                                                     |  |                 |                     |      |   |         |   |         |   |         |   |      |   |
| Source of data                                      | Projections démographiques 2010-2050 niveau national et provincial, 2017                                                                                                                                                                                                                                                                                                                                       |                                                     |  |                 |                     |      |   |         |   |         |   |         |   |      |   |
| Type of data                                        | Report, table (csv, excel)                                                                                                                                                                                                                                                                                                                                                                                     |                                                     |  |                 |                     |      |   |         |   |         |   |         |   |      |   |
| Statistical scale                                   | Metric                                                                                                                                                                                                                                                                                                                                                                                                         |                                                     |  |                 |                     |      |   |         |   |         |   |         |   |      |   |
| Unit of measurement                                 | Absolute numbers                                                                                                                                                                                                                                                                                                                                                                                               |                                                     |  |                 |                     |      |   |         |   |         |   |         |   |      |   |
| Completeness                                        | 18/18 valid                                                                                                                                                                                                                                                                                                                                                                                                    |                                                     |  |                 |                     |      |   |         |   |         |   |         |   |      |   |
| Classes/thresholds                                  | <table border="1"> <thead> <tr> <th colspan="2">Percentage share of active population (10-65 years)</th></tr> <tr> <th>Indicator value</th><th>Vulnerability class</th></tr> </thead> <tbody> <tr> <td>≥75%</td><td>1</td></tr> <tr> <td>70-&lt;75%</td><td>2</td></tr> <tr> <td>65-&lt;70%</td><td>3</td></tr> <tr> <td>60-&lt;65%</td><td>4</td></tr> <tr> <td>&lt;60%</td><td>5</td></tr> </tbody> </table> | Percentage share of active population (10-65 years) |  | Indicator value | Vulnerability class | ≥75% | 1 | 70-<75% | 2 | 65-<70% | 3 | 60-<65% | 4 | <60% | 5 |
| Percentage share of active population (10-65 years) |                                                                                                                                                                                                                                                                                                                                                                                                                |                                                     |  |                 |                     |      |   |         |   |         |   |         |   |      |   |
| Indicator value                                     | Vulnerability class                                                                                                                                                                                                                                                                                                                                                                                            |                                                     |  |                 |                     |      |   |         |   |         |   |         |   |      |   |
| ≥75%                                                | 1                                                                                                                                                                                                                                                                                                                                                                                                              |                                                     |  |                 |                     |      |   |         |   |         |   |         |   |      |   |
| 70-<75%                                             | 2                                                                                                                                                                                                                                                                                                                                                                                                              |                                                     |  |                 |                     |      |   |         |   |         |   |         |   |      |   |
| 65-<70%                                             | 3                                                                                                                                                                                                                                                                                                                                                                                                              |                                                     |  |                 |                     |      |   |         |   |         |   |         |   |      |   |
| 60-<65%                                             | 4                                                                                                                                                                                                                                                                                                                                                                                                              |                                                     |  |                 |                     |      |   |         |   |         |   |         |   |      |   |
| <60%                                                | 5                                                                                                                                                                                                                                                                                                                                                                                                              |                                                     |  |                 |                     |      |   |         |   |         |   |         |   |      |   |
| Additional comments                                 | NA                                                                                                                                                                                                                                                                                                                                                                                                             |                                                     |  |                 |                     |      |   |         |   |         |   |         |   |      |   |

Project: Multi-Hazard Assessment and Risk Mapping in Burundi. September 2020 – December 2021.

Contractor: UN IOM

Consortium: IDOM, Ramboll, Eurac Research, Meteosim, GIIIS

| Input indicator 2                     |                                                                                                                                                                                                                                                                                                                                                                                                |                                       |  |                 |                     |     |   |        |   |         |   |         |   |      |   |
|---------------------------------------|------------------------------------------------------------------------------------------------------------------------------------------------------------------------------------------------------------------------------------------------------------------------------------------------------------------------------------------------------------------------------------------------|---------------------------------------|--|-----------------|---------------------|-----|---|--------|---|---------|---|---------|---|------|---|
| Name                                  | Household heads                                                                                                                                                                                                                                                                                                                                                                                |                                       |  |                 |                     |     |   |        |   |         |   |         |   |      |   |
| Spatial resolution                    | Province                                                                                                                                                                                                                                                                                                                                                                                       |                                       |  |                 |                     |     |   |        |   |         |   |         |   |      |   |
| Description                           | Number of woman-headed households, expressed as percentage of total number of households. The greater the number of woman headed households, the higher the vulnerability, as women have less access to capital, land and employment compared to men (expert opinion).                                                                                                                         |                                       |  |                 |                     |     |   |        |   |         |   |         |   |      |   |
| Completeness                          | 17/18 valid                                                                                                                                                                                                                                                                                                                                                                                    |                                       |  |                 |                     |     |   |        |   |         |   |         |   |      |   |
| Unit of measurement                   | % of women-headed households in total population of province                                                                                                                                                                                                                                                                                                                                   |                                       |  |                 |                     |     |   |        |   |         |   |         |   |      |   |
| Method of calculation                 | Percentage: Percentage share of women-headed households was divided into five classes of vulnerability, according to expert opinion.                                                                                                                                                                                                                                                           |                                       |  |                 |                     |     |   |        |   |         |   |         |   |      |   |
| <b>Input variable 1</b>               | Percentage of women headed households                                                                                                                                                                                                                                                                                                                                                          |                                       |  |                 |                     |     |   |        |   |         |   |         |   |      |   |
| Source of data                        | INFORM Subnational Risk Assessment 2020                                                                                                                                                                                                                                                                                                                                                        |                                       |  |                 |                     |     |   |        |   |         |   |         |   |      |   |
| Type of data                          | Table (csv, excel)                                                                                                                                                                                                                                                                                                                                                                             |                                       |  |                 |                     |     |   |        |   |         |   |         |   |      |   |
| Statistical scale                     | Metric                                                                                                                                                                                                                                                                                                                                                                                         |                                       |  |                 |                     |     |   |        |   |         |   |         |   |      |   |
| Unit of measurement                   | %                                                                                                                                                                                                                                                                                                                                                                                              |                                       |  |                 |                     |     |   |        |   |         |   |         |   |      |   |
| Completeness                          | 17/18 valid                                                                                                                                                                                                                                                                                                                                                                                    |                                       |  |                 |                     |     |   |        |   |         |   |         |   |      |   |
| Classes/thresholds                    | <table border="1"> <thead> <tr> <th colspan="2">Percentage of women headed households</th></tr> <tr> <th>Indicator value</th><th>Vulnerability class</th></tr> </thead> <tbody> <tr> <td>&lt;5%</td><td>1</td></tr> <tr> <td>5-&lt;10%</td><td>2</td></tr> <tr> <td>10-&lt;15%</td><td>3</td></tr> <tr> <td>15-&lt;20%</td><td>4</td></tr> <tr> <td>≥20%</td><td>5</td></tr> </tbody> </table> | Percentage of women headed households |  | Indicator value | Vulnerability class | <5% | 1 | 5-<10% | 2 | 10-<15% | 3 | 15-<20% | 4 | ≥20% | 5 |
| Percentage of women headed households |                                                                                                                                                                                                                                                                                                                                                                                                |                                       |  |                 |                     |     |   |        |   |         |   |         |   |      |   |
| Indicator value                       | Vulnerability class                                                                                                                                                                                                                                                                                                                                                                            |                                       |  |                 |                     |     |   |        |   |         |   |         |   |      |   |
| <5%                                   | 1                                                                                                                                                                                                                                                                                                                                                                                              |                                       |  |                 |                     |     |   |        |   |         |   |         |   |      |   |
| 5-<10%                                | 2                                                                                                                                                                                                                                                                                                                                                                                              |                                       |  |                 |                     |     |   |        |   |         |   |         |   |      |   |
| 10-<15%                               | 3                                                                                                                                                                                                                                                                                                                                                                                              |                                       |  |                 |                     |     |   |        |   |         |   |         |   |      |   |
| 15-<20%                               | 4                                                                                                                                                                                                                                                                                                                                                                                              |                                       |  |                 |                     |     |   |        |   |         |   |         |   |      |   |
| ≥20%                                  | 5                                                                                                                                                                                                                                                                                                                                                                                              |                                       |  |                 |                     |     |   |        |   |         |   |         |   |      |   |
| Additional comments                   | NA                                                                                                                                                                                                                                                                                                                                                                                             |                                       |  |                 |                     |     |   |        |   |         |   |         |   |      |   |

Project: Multi-Hazard Assessment and Risk Mapping in Burundi. September 2020 – December 2021.

Contractor: UN IOM

Consortium: IDOM, Ramboll, Eurac Research, Meteosim, GIIS

| SUBCOMPONENT 3                         |                                                                                                                                                                                                                                                                                                                                                                                                     |                                        |  |                 |                     |      |   |          |   |          |   |          |   |      |   |
|----------------------------------------|-----------------------------------------------------------------------------------------------------------------------------------------------------------------------------------------------------------------------------------------------------------------------------------------------------------------------------------------------------------------------------------------------------|----------------------------------------|--|-----------------|---------------------|------|---|----------|---|----------|---|----------|---|------|---|
| Name                                   | Population density 2020                                                                                                                                                                                                                                                                                                                                                                             |                                        |  |                 |                     |      |   |          |   |          |   |          |   |      |   |
| Spatial resolution                     | Colline                                                                                                                                                                                                                                                                                                                                                                                             |                                        |  |                 |                     |      |   |          |   |          |   |          |   |      |   |
| Description                            | The Population density 2020 subcomponent is built of one indicator at colline resolution showing population density.                                                                                                                                                                                                                                                                                |                                        |  |                 |                     |      |   |          |   |          |   |          |   |      |   |
| Completeness                           | 532/532 valid                                                                                                                                                                                                                                                                                                                                                                                       |                                        |  |                 |                     |      |   |          |   |          |   |          |   |      |   |
| <b>Input indicator 1</b>               |                                                                                                                                                                                                                                                                                                                                                                                                     |                                        |  |                 |                     |      |   |          |   |          |   |          |   |      |   |
| Name                                   | Population density                                                                                                                                                                                                                                                                                                                                                                                  |                                        |  |                 |                     |      |   |          |   |          |   |          |   |      |   |
| Spatial resolution                     | Colline                                                                                                                                                                                                                                                                                                                                                                                             |                                        |  |                 |                     |      |   |          |   |          |   |          |   |      |   |
| Description                            | Population density calculated using population numbers collected through the 2020 IOM DTM-DRR data collection campaign. The higher the density, the higher the vulnerability, since higher density population put pressure on resources and services.                                                                                                                                               |                                        |  |                 |                     |      |   |          |   |          |   |          |   |      |   |
| Completeness                           | 18/18 valid                                                                                                                                                                                                                                                                                                                                                                                         |                                        |  |                 |                     |      |   |          |   |          |   |          |   |      |   |
| Unit of measurement                    | % of active population in total population of province                                                                                                                                                                                                                                                                                                                                              |                                        |  |                 |                     |      |   |          |   |          |   |          |   |      |   |
| Method of calculation                  | Ratio: Calculating population density by dividing <i>Population of colline</i> by <i>Colline area km<sup>2</sup> (in GIS)</i> . Resulting indicator <i>Population density per km<sup>2</sup></i> was divided into five classes of vulnerability, according to expert opinion.                                                                                                                       |                                        |  |                 |                     |      |   |          |   |          |   |          |   |      |   |
| <b>Input variable 1</b>                |                                                                                                                                                                                                                                                                                                                                                                                                     |                                        |  |                 |                     |      |   |          |   |          |   |          |   |      |   |
| Survey question                        | A9.2. # d'individus                                                                                                                                                                                                                                                                                                                                                                                 |                                        |  |                 |                     |      |   |          |   |          |   |          |   |      |   |
| Source of data                         | DTM-DRR Sept/Oct 2020/IOM survey (DTMBurundi@iom.int)                                                                                                                                                                                                                                                                                                                                               |                                        |  |                 |                     |      |   |          |   |          |   |          |   |      |   |
| Type of data                           | Table (csv, excel)                                                                                                                                                                                                                                                                                                                                                                                  |                                        |  |                 |                     |      |   |          |   |          |   |          |   |      |   |
| Statistical scale                      | Metric                                                                                                                                                                                                                                                                                                                                                                                              |                                        |  |                 |                     |      |   |          |   |          |   |          |   |      |   |
| Unit of measurement                    | Absolute numbers                                                                                                                                                                                                                                                                                                                                                                                    |                                        |  |                 |                     |      |   |          |   |          |   |          |   |      |   |
| Completeness                           | 532/532 valid                                                                                                                                                                                                                                                                                                                                                                                       |                                        |  |                 |                     |      |   |          |   |          |   |          |   |      |   |
| <b>Input variable 2</b>                |                                                                                                                                                                                                                                                                                                                                                                                                     |                                        |  |                 |                     |      |   |          |   |          |   |          |   |      |   |
| Source of data                         | IGEBU/OCHA, 2017                                                                                                                                                                                                                                                                                                                                                                                    |                                        |  |                 |                     |      |   |          |   |          |   |          |   |      |   |
| Type of data                           | Geodata (shapefiles)                                                                                                                                                                                                                                                                                                                                                                                |                                        |  |                 |                     |      |   |          |   |          |   |          |   |      |   |
| Statistical scale                      | Metric                                                                                                                                                                                                                                                                                                                                                                                              |                                        |  |                 |                     |      |   |          |   |          |   |          |   |      |   |
| Unit of measurement                    | km <sup>2</sup>                                                                                                                                                                                                                                                                                                                                                                                     |                                        |  |                 |                     |      |   |          |   |          |   |          |   |      |   |
| Completeness                           | 532/532 valid                                                                                                                                                                                                                                                                                                                                                                                       |                                        |  |                 |                     |      |   |          |   |          |   |          |   |      |   |
| Classes/thresholds                     | <table border="1"> <thead> <tr> <th colspan="2">Population density per km<sup>2</sup></th></tr> <tr> <th>Indicator value</th><th>Vulnerability class</th></tr> </thead> <tbody> <tr> <td>&lt;100</td><td>1</td></tr> <tr> <td>100-&lt;200</td><td>2</td></tr> <tr> <td>200-&lt;300</td><td>3</td></tr> <tr> <td>300-&lt;450</td><td>4</td></tr> <tr> <td>≥450</td><td>5</td></tr> </tbody> </table> | Population density per km <sup>2</sup> |  | Indicator value | Vulnerability class | <100 | 1 | 100-<200 | 2 | 200-<300 | 3 | 300-<450 | 4 | ≥450 | 5 |
| Population density per km <sup>2</sup> |                                                                                                                                                                                                                                                                                                                                                                                                     |                                        |  |                 |                     |      |   |          |   |          |   |          |   |      |   |
| Indicator value                        | Vulnerability class                                                                                                                                                                                                                                                                                                                                                                                 |                                        |  |                 |                     |      |   |          |   |          |   |          |   |      |   |
| <100                                   | 1                                                                                                                                                                                                                                                                                                                                                                                                   |                                        |  |                 |                     |      |   |          |   |          |   |          |   |      |   |
| 100-<200                               | 2                                                                                                                                                                                                                                                                                                                                                                                                   |                                        |  |                 |                     |      |   |          |   |          |   |          |   |      |   |
| 200-<300                               | 3                                                                                                                                                                                                                                                                                                                                                                                                   |                                        |  |                 |                     |      |   |          |   |          |   |          |   |      |   |
| 300-<450                               | 4                                                                                                                                                                                                                                                                                                                                                                                                   |                                        |  |                 |                     |      |   |          |   |          |   |          |   |      |   |
| ≥450                                   | 5                                                                                                                                                                                                                                                                                                                                                                                                   |                                        |  |                 |                     |      |   |          |   |          |   |          |   |      |   |
| Additional comments                    | NA                                                                                                                                                                                                                                                                                                                                                                                                  |                                        |  |                 |                     |      |   |          |   |          |   |          |   |      |   |

Project: Multi-Hazard Assessment and Risk Mapping in Burundi. September 2020 – December 2021.

Contractor: UN IOM

Consortium: IDOM, Ramboll, Eurac Research, Meteosim, GIS

| SUBCOMPONENT 4        |                                                                                                                                                                                                                                                                                                                                                                                                                                                                        |
|-----------------------|------------------------------------------------------------------------------------------------------------------------------------------------------------------------------------------------------------------------------------------------------------------------------------------------------------------------------------------------------------------------------------------------------------------------------------------------------------------------|
| Name                  | Disadvantaged population                                                                                                                                                                                                                                                                                                                                                                                                                                               |
| Spatial resolution    | Colline                                                                                                                                                                                                                                                                                                                                                                                                                                                                |
| Description           | The Disadvantaged population subcomponent is built from one indicator at colline resolution, Vulnerable households, which shows the number of households having at least one vulnerable member (elderly, chronically ill, with disabilities. Pregnant women, breastfeeding women).                                                                                                                                                                                     |
| Completeness          | 525/532 valid                                                                                                                                                                                                                                                                                                                                                                                                                                                          |
| Input indicator 1     |                                                                                                                                                                                                                                                                                                                                                                                                                                                                        |
| Name                  | Vulnerable households                                                                                                                                                                                                                                                                                                                                                                                                                                                  |
| Spatial resolution    | Colline                                                                                                                                                                                                                                                                                                                                                                                                                                                                |
| Description           | Number of households with 'vulnerable people' expressed as percentage of total households. The greater the number of households with vulnerable people, the higher the vulnerability, since vulnerable people contribute less to households or may be a financial burden on households.                                                                                                                                                                                |
| Completeness          | 525/532 valid                                                                                                                                                                                                                                                                                                                                                                                                                                                          |
| Unit of measurement   | Expert opinion                                                                                                                                                                                                                                                                                                                                                                                                                                                         |
| Method of calculation | Matrix: Categorical variable <i>Number of households with vulnerable people</i> was set into relation with metric variable <i>Total number of households</i> in a matrix. <i>Total number of households</i> was first divided into 7 classes of nr. of households (expert opinion), then <i>Number of households with vulnerable people</i> was set into relation with the classes of households and all possible combinations were assigned to a vulnerability class. |
| Input variable 1      |                                                                                                                                                                                                                                                                                                                                                                                                                                                                        |
| Survey question       | B10. Quel est le nombre de ménages avec des individus vulnérables (porteurs de handicaps ou de maladies chroniques, femmes enceintes ou allaitantes, personnes âgées)?                                                                                                                                                                                                                                                                                                 |
| Source of data        | DTM-DRR Sept/Oct 2020/IOM survey (DTMBurundi@iom.int)                                                                                                                                                                                                                                                                                                                                                                                                                  |
| Type of data          | Table (csv, excel)                                                                                                                                                                                                                                                                                                                                                                                                                                                     |
| Statistical scale     | Categorical                                                                                                                                                                                                                                                                                                                                                                                                                                                            |
| Unit of measurement   | Absolute numbers                                                                                                                                                                                                                                                                                                                                                                                                                                                       |
| Completeness          | 525/532 valid                                                                                                                                                                                                                                                                                                                                                                                                                                                          |

Project: Multi-Hazard Assessment and Risk Mapping in Burundi. September 2020 – December 2021.

Contractor: UN IOM

Consortium: IDOM, Ramboll, Eurac Research, Meteosim, GHS

|                     |                                                       |     |      |       |     |                              |
|---------------------|-------------------------------------------------------|-----|------|-------|-----|------------------------------|
| Input variable 2    | Total number of households                            |     |      |       |     |                              |
| Survey question     | A9.1. # de ménages                                    |     |      |       |     |                              |
| Source of data      | DTM-DRR Sept/Oct 2020/IOM survey (DTMBurundi@iom.int) |     |      |       |     |                              |
| Type of data        | Table (csv, excel)                                    |     |      |       |     |                              |
| Statistical scale   | Metric                                                |     |      |       |     |                              |
| Unit of measurement | Absolute numbers                                      |     |      |       |     |                              |
| Completeness        | 532/532 valid                                         |     |      |       |     |                              |
| Classes/thresholds  | B_11_number_of_vulnerable_households_in_colline       |     |      |       |     |                              |
|                     | Nr. of households                                     |     |      |       |     | Nr. of vulnerable households |
|                     | >2500                                                 | 1   | 1    | 2     | 3   |                              |
|                     | 1801-2500                                             | 1   | 2    | 3     | 4   |                              |
|                     | 1201-1800                                             | 2   | 2    | 3     | 4   |                              |
|                     | 801-1200                                              | 3   | 3    | 4     | 5   |                              |
|                     | 401-800                                               | 3   | 4    | 5     | 5   |                              |
|                     | 201-400                                               | 4   | 5    | 5     | 5   |                              |
|                     | 0-200                                                 | 4   | 5    | 5     | 5   |                              |
|                     |                                                       | 0-5 | 6-10 | 11-50 | >50 |                              |
| Additional comments | NA                                                    |     |      |       |     |                              |

Project: Multi-Hazard Assessment and Risk Mapping in Burundi. September 2020 – December 2021.

Contractor: UN IOM

Consortium: IDOM, Ramboll, Eurac Research, Meteosim, GIIS
