# Supplementary material for: Comprehensive multi-hazard risk assessment in data-scarce regions. A study focused on Burundi
Source: Copernicus journal article supplement (doi:10.5194/egusphere-2024-3445), 2025-01-21
Supplement: Supplementary file [file egusphere-2024-3445-AC1-supplement.zip]

*This document contains the interview and focus group questions from the socioeconomic vulnerability assessment of the project Multi-Hazard Risk Assessment and Risk Mapping in Burundi which ran from September 2020 to December 2021 and was contracted by the UN IOM. The consortium was composed of IDOM, Ramboll, Eurac Research, Meteosim and GIIS-GEOLYDER.*

*This document is included as additional material of the following publication:*

*Delves, J., Renner, K., Campalani, P., Piñón, J., Schneiderbauer, S., Steger, S., Moreno, M., Oterino, M. B., Perez, E., and Pittore, M.: Comprehensive multi-hazard risk assessment in data-scarce regions. A study focused on Burundi, EGUsphere [preprint], <https://doi.org/10.5194/egusphere-2024-3445>, 2025.*

---

## Le projet et notre équipe

Notre équipe EURAC réalise **l'évaluation de la vulnérabilité sociale** d'un projet plus large d'une cartographie du risque au Burundi. Il est essentiel de comprendre la vulnérabilité sociale d'une communauté pour savoir comment gérer les catastrophes et construire des communautés résilientes.

L'objectif de notre évaluation de la vulnérabilité sociale est de comprendre quelles collines sont les plus susceptibles d'être affectées par une catastrophe et d'avoir du mal à s'en remettre. Nous effectuons notre évaluation à l'échelle nationale en examinant les données au niveau provincial, et nous l'effectuons également au niveau local (colline), en utilisant les données recueillies récemment par l'OIM, qui a réalisé des questionnaires dans 602 collines.

Nous mesurons la vulnérabilité sociale en examinant de nombreuses caractéristiques différentes de la colline et en déterminant si elles la rendent plus ou moins vulnérable. Les types de caractéristiques varient, par exemple : la taille moyenne des ménages, la proximité du ménage aux services (centre de santé ou école), et aux routes, le niveau de scolarisation des habitants, etc. Nous prenons toutes ces informations et construisons un indice de vulnérabilité.

Cependant, comme nous ne sommes pas des experts de la société burundaise, nous avons besoin de la contribution d'experts locaux pour comprendre comment certaines des données que nous avons collectées peuvent être utilisées dans cet indice. Par exemple, nous ne savons pas si le fait d'avoir de nombreux membres dans un ménage est un avantage - parce qu'ils peuvent aider à reconstruire après une catastrophe - ou un inconvénient - parce qu'il y a plus de personnes à nourrir. Ces questions simples nous aideront à consolider notre indice et à nous assurer que nous tirons le meilleur parti des données dont nous disposons.

## Grille d'entretien

### **Présentation du projet et de l'équipe**

Environ 5 min

### **Activité 1 : identifier des caractéristiques de la vulnérabilité**

Environ 30 min

Imaginez une communauté qui a été touchée par une violente tempête. À différents endroits sur la colline se trouvent deux maisons identiques, chacune abritant une famille. Les deux maisons, et leurs champs agricoles, subissent le même type et le même niveau de dégâts. Quelles sont les caractéristiques de chaque ménage qui pourraient les rendre moins aptes à reprendre une vie normale après les dégâts subis par leur propriété ?

Quelques idées d'éléments à prendre en compte :

- La composition du ménage
  - A quel âge les enfants commencent-ils à contribuer au ménage ? A quel âge les personnes âgées cessent-elles de contribuer au ménage ?
  - Les ménages sans homme adulte (seule la mère est présente) sont-ils moins aptes à faire face aux chocs ?
- La situation financière du ménage
  - Vendent-ils leurs récoltes ? Ont-ils une épargne financière ?
  - Est-ce qu'un membre de la famille gagne un salaire ? Quel type d'emploi exerce-t-il ?
- Connaissance/expérience des catastrophes
  - Le ménage a-t-il été confronté à des catastrophes dans le passé ?
  - Existe-t-il un système d'éducation et/ou d'alerte sur les catastrophes potentielles ?
- Sécurité alimentaire et de l'eau
  - Où le ménage se procure-t-il de l'eau ?
  - Le ménage achète-t-il de la nourriture ou la cultive-t-il ? A-t-il des stocks de nourriture ?
- L'emplacement de la maison
  - La maison est-elle proche d'écoles, d'hôpitaux, de sources d'eau, de marchés ?

## **Activité 2 : répondre à une question spécifique sur la vulnérabilité**

**Environ 20 min**

Imaginez qu'une inondation a détruit la plupart des terres agricoles d'une famille et endommagé sa maison. Il n'y a aucune possibilité de recevoir de l'aide extérieure (e.g. des ONGs) et la famille doit décider de ce qu'elle va faire. Voici une liste de leurs réactions possibles (qui correspondent à des réponses données dans le questionnaire d'OIM). Lesquelles semblent indiquer qu'un ménage a été particulièrement touché par une catastrophe ? Lesquelles sont des réponses 'ordinaires' à une catastrophe et lesquels sont plutôt graves ?

- Vente de bétail
- Vente de stock
- Vente d'autres biens
- Envoi des enfants pour vivre chez les amis
- Retirer les enfants de l'école
- Emprunter chez les amis, employeur
- Pris du crédit avec une institution financière
- Reçu de l'assistance des ONG ou gouvernement
- Réduit la consommation alimentaire
- Les membres du ménage ont migré pour travailler

- Fait des achats à crédit
- Vendu les récoltes avant maturité
- Vendre la maison/les terres
- Mendier
- Vendre les animaux qui restent
- Réduire les dépenses alimentaires (réduire la qualité/quantité des repas, réduire le nombre de repas, restreindre la consommation de certains membres des ménages...)
- Migration ailleurs
- N'a rien fait

|                     |   |   |   |                                   |
|---------------------|---|---|---|-----------------------------------|
| 1 – très peu touché | 2 | 3 | 4 | 5 – très touché / situation grave |
|                     |   |   |   |                                   |

### **Activité 3 Questions spécifiques (pour stakeholder experts)**

#### **Réfugiés rapatriés**

Les réfugiés rapatriés reçoivent-ils de l'aide pour se réinstaller au Burundi, et se trouvent-ils dans une situation stable ? Est-ce qu'un nombre élevé de réfugiés rapatriés dans une province signifierait que celle-ci est plus vulnérable ?

#### **Aide des ONG**

En général, l'aide des ONGs est-elle fournie aux collines qui en ont le plus besoin, et si oui, comment est le besoin des collines évalué ? Ou bien l'aide est-elle fournie en fonction d'autres facteurs, par exemple, l'accessibilité de la colline, la taille de la colline, le nombre de personnes déplacées internes dans une colline ?

De même, le type d'aide fourni aux collines (surtout après une catastrophe) est-il basé sur l'évaluation des besoins de la colline, ou est-il courant qu'un " paquet " standard d'aide de base soit fourni à toutes les collines qui reçoivent de l'aide (par exemple, de la nourriture, des médicaments, des abris).

#### **Taille moyenne des ménages**

Quel est, selon vous, l'impact d'un grand ménage (un ménage avec beaucoup d'enfants de tous âges et d'adultes de tous âges) ? Est-ce qu'un grand nombre de ménages grands permet à une colline de mieux réagir à une catastrophe, ou est-ce que cela rend la réponse à une catastrophe plus difficile à gérer ?
